# Supplementary figures and images for: Therapeutic effect of indirubin-loaded bovine serum albumin nanoparticules on ulcerative colitis
Source: Royal Society of Chemistry journal article supplement (doi:10.1039/d1bm01896e), 2022-01-01

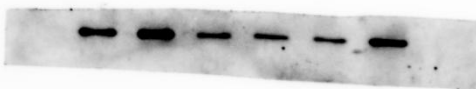

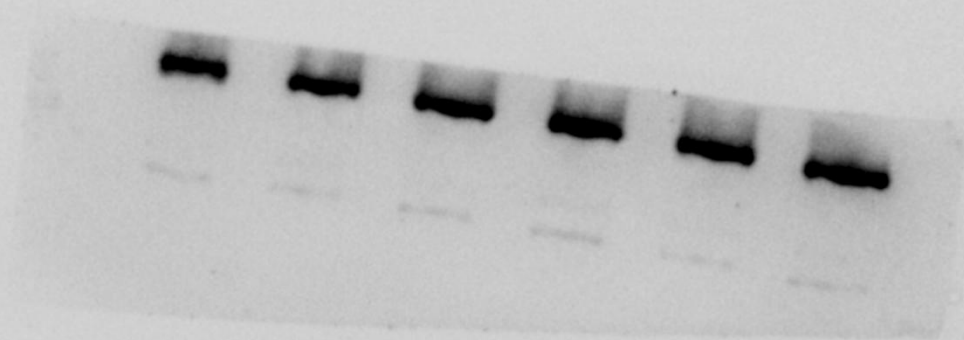

0 1 2 3 4 5

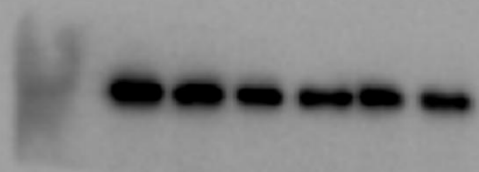

Supplement: d1bm01896e1.pdf [file d1bm01896e1.pdf]
